# Supplementary material
Source: PubMed Central journal article supplement (PMC2992370)
Supplement: supp_fj.10-154757_10-154757SuppFigs.pdf [file supp_fj.10-154757_10-154757SuppFigs.pdf]

**SUPPLEMENTARY FIGURES**

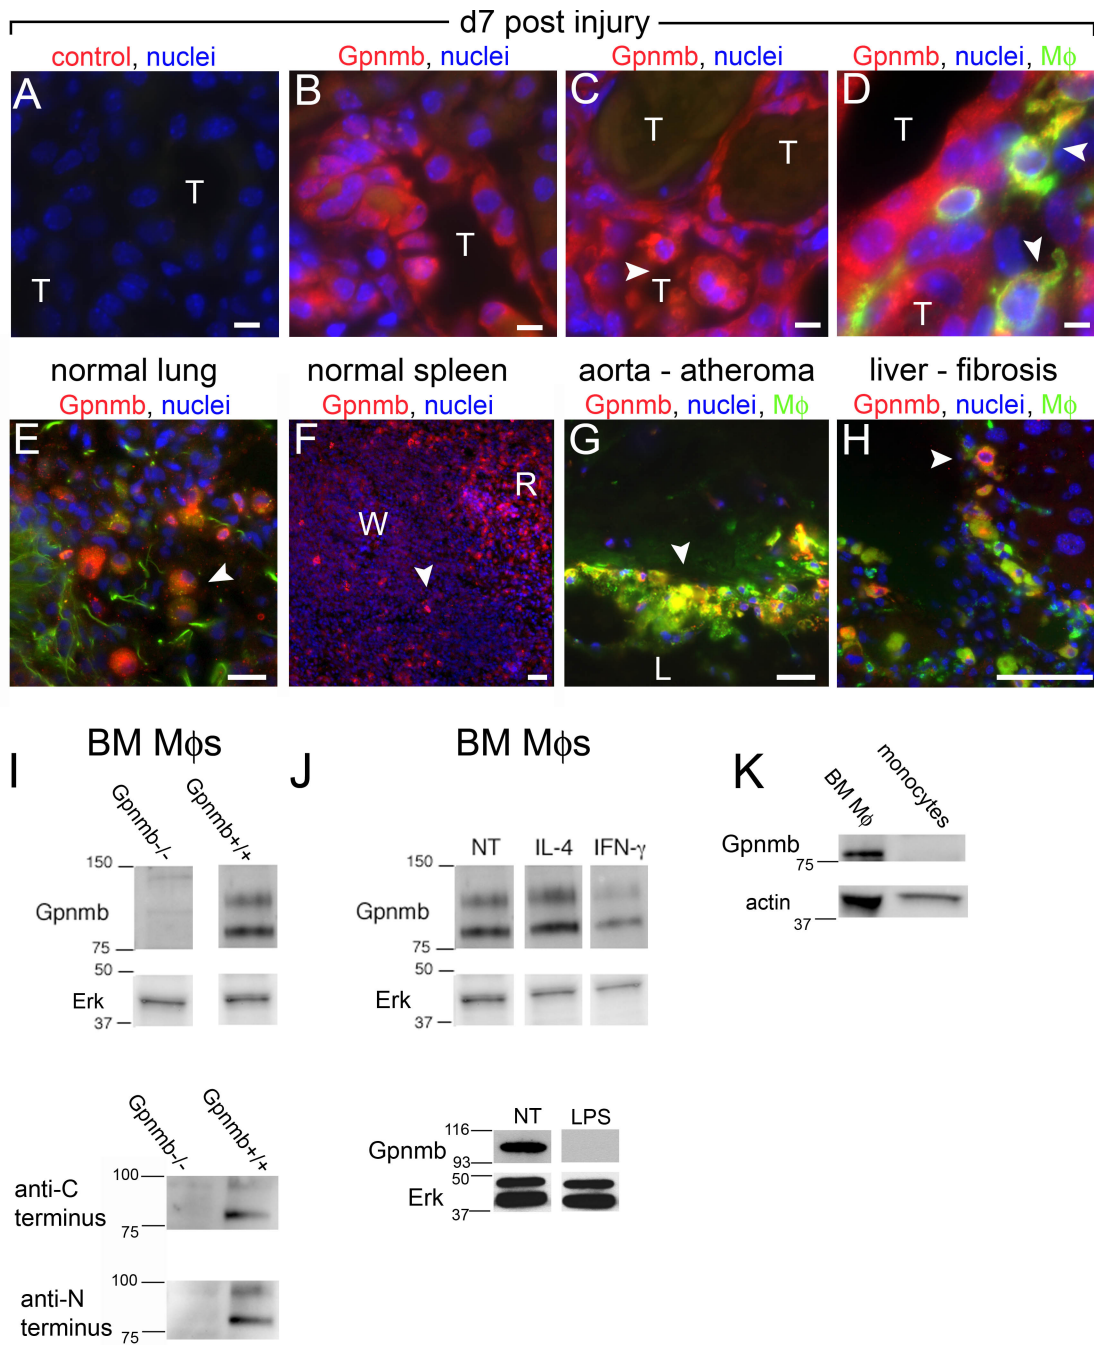

**FIGURE S1.** Pattern of Gpnmb expression in mouse kidney, other mouse tissues and macrophages. (**A-D**) Control antibody (**A**) or anti-N terminal Gpnmb detection in d7 post IRI kidney outer medulla (**B-C**) [T-tubule]. Note intratubular phagocytes [arrowhead].

Co-labeling for macrophages [arrowheads] (**D**) in inner medulla shows positivity in intracellular compartments. Anti-N terminal Gpnmb detection normal lung (**E**) showing positive staining in alveolar macrophages. (**F**) Low-power view of spleen showing high expression of Gpnmb in the red pulp [R], and only a few positive cells in white pulp [W], identified as tingible body macrophages (arrows). (**G**) Gpnmb (red) and CD68 (green) labeling of aortic arch atheromatous plaque from d165 ApoE<sup>-/-</sup> mice fed on high fat diet. The aortic lumen is denoted [L]. Gpnmb and CD68 co-localize in lesional macrophages. (**H**) Immunofluorescence for Gpnmb (red) and macrophage marker CD68 (green) in fibrotic scars in mouse livers after 12 weeks of CCl<sub>4</sub> injury. Note large round phagocytes (long arrow) co-express CD68 and Gpnmb whereas smaller CD68 +ve Mφs (small arrow) and Kupffer cells (short arrow) lack Gpnmb. (**I**) Western blot of whole cell lysates from BMMφs detecting Gpnmb using anti-C terminal antibodies (upper) or comparing both anti-N and anti-C termini antibodies (lower). (**J**) Detection of Gpnmb in unstimulated or 24h stimulated BMMφs whole cell lysates. Note that both IFN $\gamma$  and LPS down-regulate Gpnmb expression. (**K**) Detection of Gpnmb in blood monocytes compared with BMMφs (bar = 50 $\mu$ m).

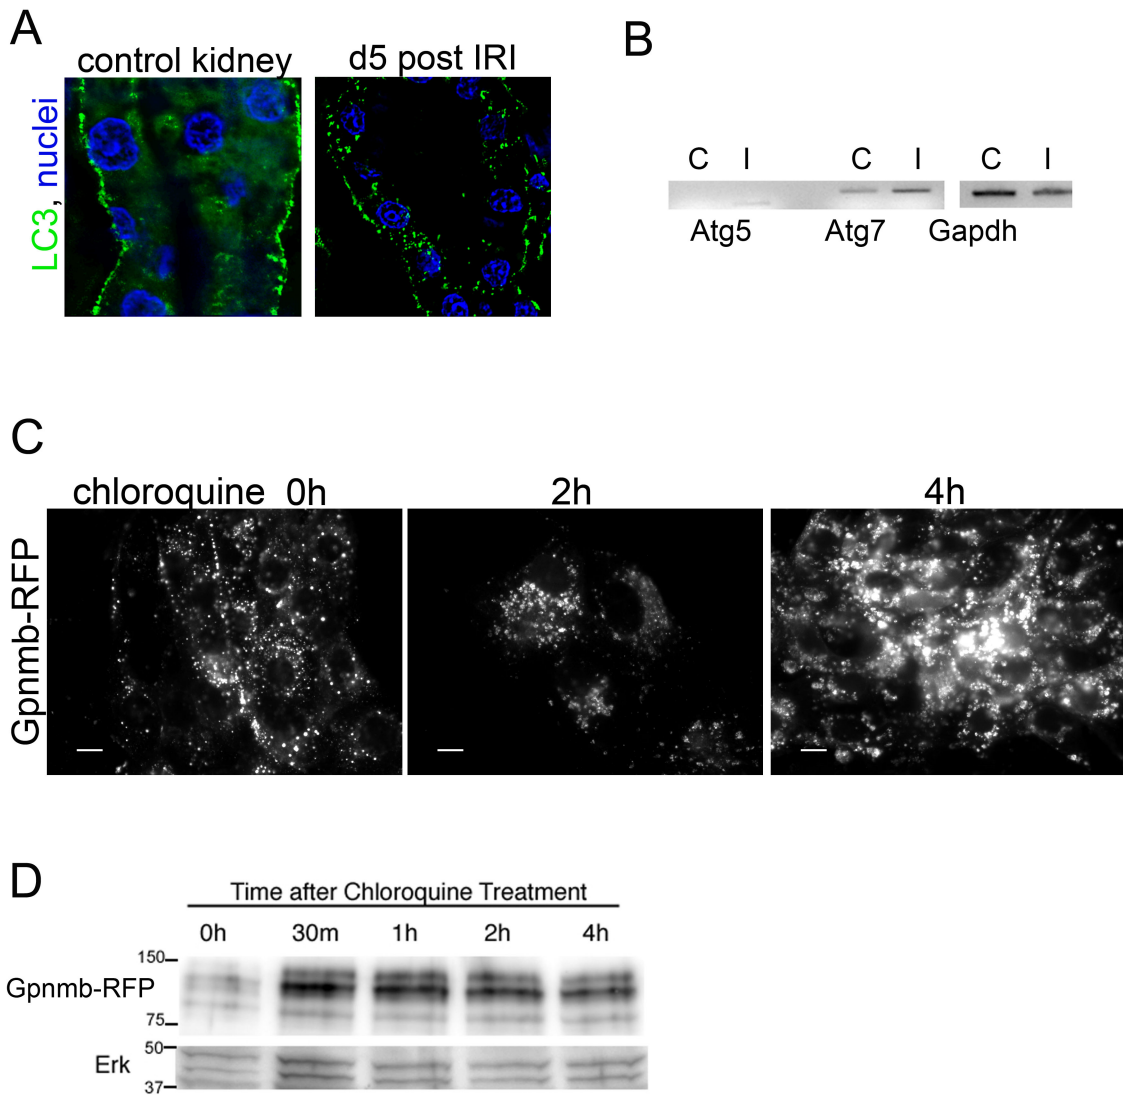

**FIGURE S2.** Characterization of autophagosomes in kidney tubule cells *in vivo* and *in vitro*. **(A)** Confocal images of antibody detected endogenous LC3 in normal proximal tubule of rat kidney and 5d post IRI. Note redistribution of LC3 in the injured tubules from a cytosolic and basement membrane distribution to an endosomal distribution. **(B)** RT-PCR for Atg protein transcripts from healthy proximal tubule cells purified from mouse kidney ‘C’ or injured proximal tubules purified from d5 post IRI kidney ‘I’. Note that both *Atg5* and *Atg7* are upregulated following injury. **(C)** Fluorescent micrographs of

Gpnmb-RFP+ expressing LLC-PK1 kidney epithelial cells at timepoints following chloroquine treatment. Note rapid accumulation and expansion of Gpnmb-RFP+ vesicles.

**(D)** Immunoblot detecting Gpnmb-RFP in Gpnmb-RFP cells at timepoints after chloroquine treatment.



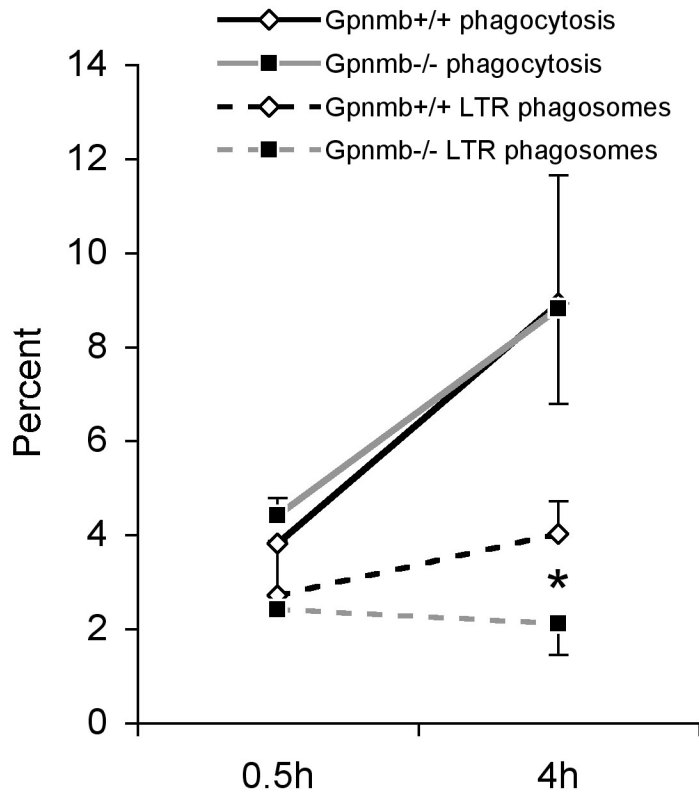

**FIGURE S3.** Acidification of apoptotic body containing phagosomes is delayed in *Gpnmb*<sup>-/-</sup> peritoneal macrophages *in vivo*. Graph showing the % phagocytosis by d4 thioglycollate peritoneal macrophages at 30min and 4h after IP injection of 10million apoptotic thymocytes (solid lines) and also the % of macrophages with lysotracker red +ve acidified phagosomes. Phagosomes in *Gpnmb*<sup>+/+</sup> macrophages were observed to undergo acidification while those of *Gpnmb*<sup>-/-</sup> macrophages did not (n=4/group \* *P* < 0.05).

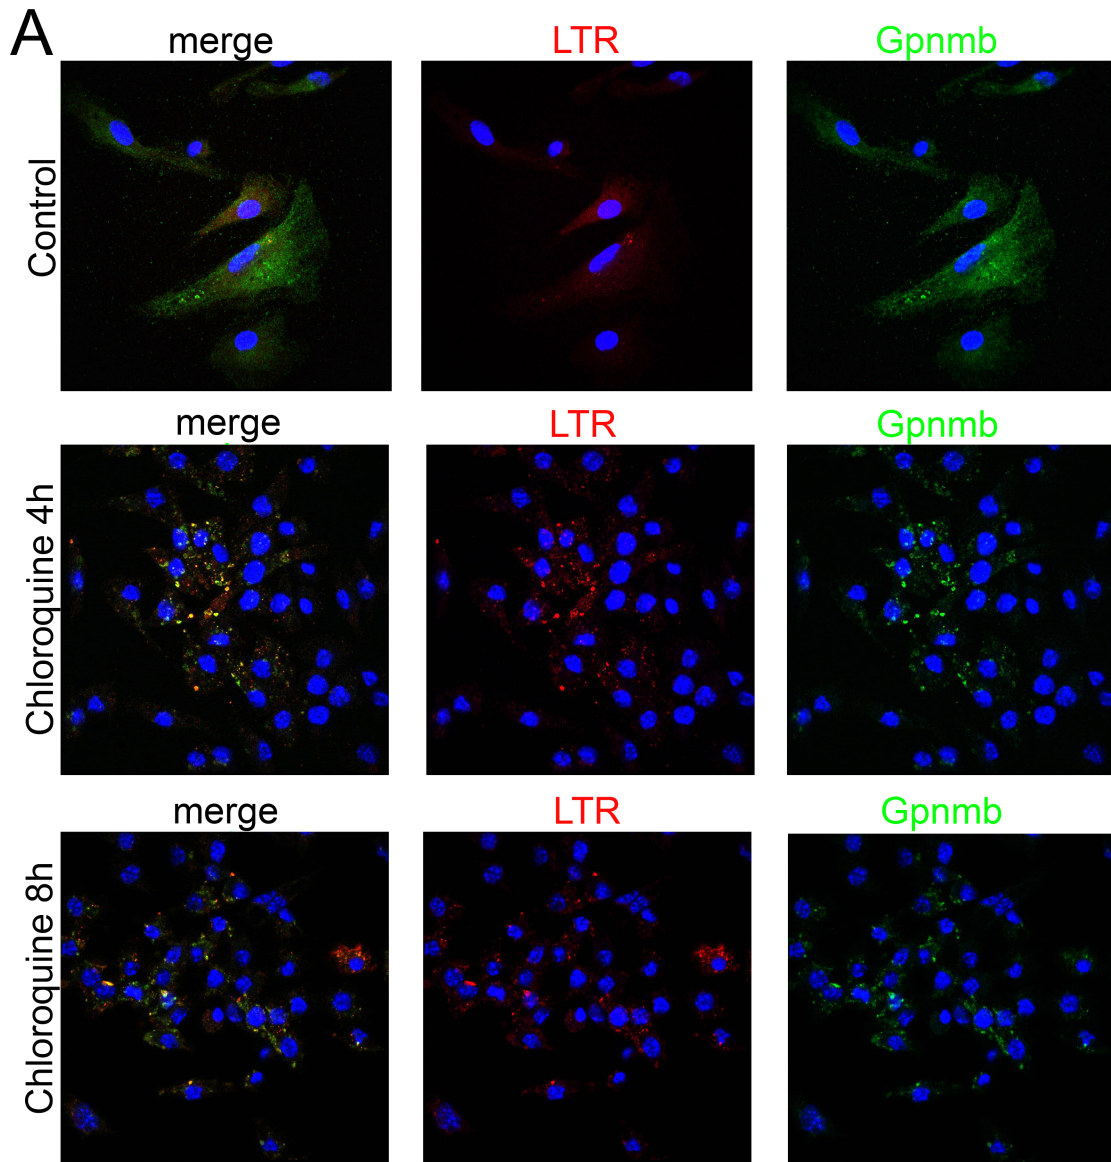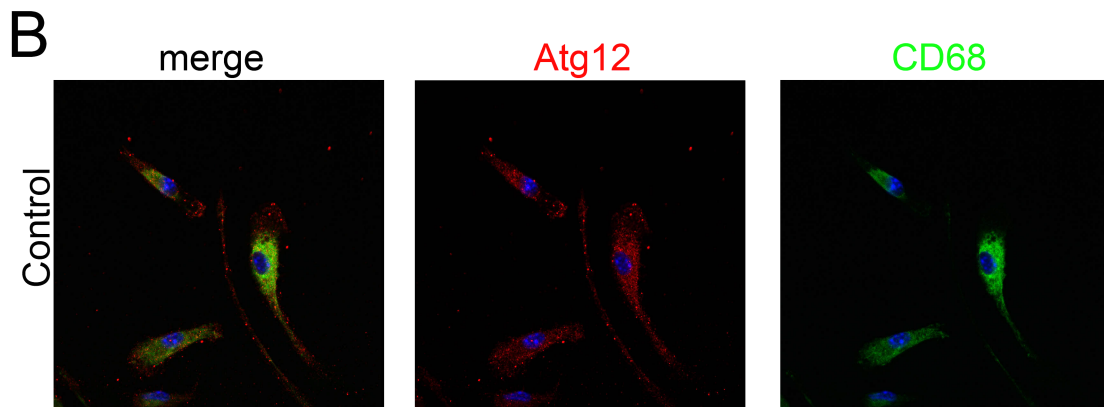

**FIGURE S4.** Characterization of Gpnmb compartments in macrophages. **(A)** Confocal images of Gpnmb (green) and lysotracker red in control or chloroquine treated BMM $\phi$ s. **(B)** Confocal images for Atg12 and CD68 in control BMM $\phi$ s
